# Supplementary material
Source: PubMed Central journal article supplement (PMC2923912)

## Supplemental data

“Freezing tolerance and flowering regulation in cereals: the *VRN-1* connection”

**Table S1.** Primers used for quantitative RT-PCR

| Gene          | Forward primer<br>(5'-3')  | Reverse primer<br>(5'-3') | Prod.<br>bp <sup>1</sup> | Eff.<br>(%) <sup>2</sup> |
|---------------|----------------------------|---------------------------|--------------------------|--------------------------|
| <i>CBF12</i>  | GTCCCACTCCCACTCACAG        | ACATGTCGTGGCACAATGC       | 74                       | 95                       |
| <i>CBF14</i>  | CCACCAAATATGGGAGGAAA       | GCTTTCACAATGAACGAGCA      | 73                       | 92                       |
| <i>CBF15</i>  | CATGTTGAGCTGGATATGTCCGGGG  | GGGAACAGCTTCGGTTTGTTCATGC | 213                      | 100                      |
| <i>CBF16</i>  | GCGGCATGCCTCCAACAGCGCAG    | ACGTGCCCAGGTCCATCTCCCCG   | 200                      | 93                       |
| <i>CBF13</i>  | TGGACATCGACATGTTTCAGGCTTG  | CAGAGCAGAATCAGATGGGGAATC  | 214                      | 91                       |
| <i>CBF10</i>  | TGTTTCAGTAGGCTTGACTTGTCCCG | GCAGAATCGGCTACAAGCTCCAG   | 180                      | 86                       |
| <i>CBF3</i>   | GCGGTGGACACCGATATGTTTCAG   | GCGAGGGGAATTATCGACTGTAC   | 204                      | 87                       |
| <i>CBF17</i>  | GAGTTCGACTTGAGCTGGA        | CGAAATCCGCGTAGTAGGAG      | 67                       | 96                       |
| <i>CBF9</i>   | CCAGCAGCAGCAGATCATT        | CGCCGGAAGACATGTAAAAC      | 65                       | 92                       |
| <i>CBF4</i>   | GCTGTTCTCCATGTCGTCAG       | GTAGTACGACCCGGCAACC       | 82                       | 94                       |
| <i>CBF2</i>   | GTCCATCACCTCCAACGACT       | GCGCCAAGTTTGCGTAGTA       | 89                       | 86                       |
| <i>COR14b</i> | GAGCGACTCCTGCTAACGAC       | CTACCGCCTCCTGTACCTTG      | 135                      | 96                       |
| <i>ACTIN</i>  | ACCTTCAGTTGCCAGCAAT        | CAGAGTCGAGCACAATACCAGTTG  | 91                       | 98                       |
| <i>TEF1</i>   | GCCCTCCTTGCTTTCACTCT       | AACGCGCCTTTGAGTACTTG      | 91                       | 99                       |

<sup>1</sup> PCR product size in base pairs. <sup>2</sup> Primers efficiency.

**Figure S1.** Dominant *VRN-1* molecular marker used to classify segregating plants into homozygous mutants (*mvp/mvp*) and heterozygous plus homozygous wild type (*Mvp/-*) classes. The borders of the deletion are currently unknown.

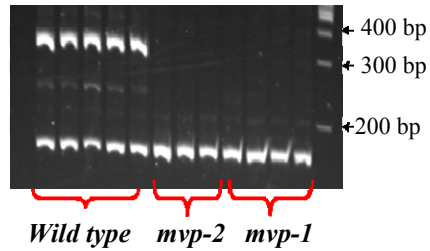

**Methods for Fig. S1:** This dominant marker uses three primers in the PCR reaction. Primers MVP\_F-18 and MVP\_R-22 amplify a 172-bp band in both the mutant and non-mutant lines that is used as an amplification control, whereas primers MVP\_F-18 and MVP\_R-23 amplify a 340-bp band that is only present in the non-mutant lines. PCRs were carried out in a 20  $\mu$ l volume using 500 p moles each of MVP\_R22 and MVP\_R23, and 750 p moles of MVP\_F18.

**Primers:**

MVP\_F-18: 5'-AGCCACAAGAACCGGGACTA-3'

MVP\_R-22: 5'-ATTCAAGCCCCAATGTTCTC-3'

MVP\_R-23: 5'-CCCAAACCTTGCGGTGTATC-3'

**PCR conditions:**

40 cycles of: 94°C-20 s, 60°C-20 s, 72°C-15 s.

**Figure S2:** Apices of *Mvp-2*<sup>-/-</sup> and *mvp-2/mvp-2* plants before and after cold acclimation in the freezing tolerance test described in Figure S3 (-12 °C). Apices were photographed after 35 days at 20 °C and again after additional 18 days of cold hardening at 4 °C before the freezing experiment. The apices from the *mvp-2/mvp-2* mutant plants were at the vegetative stage whereas those from *Mvp-2*<sup>-/-</sup> plants were at the double ridge stage (dr).

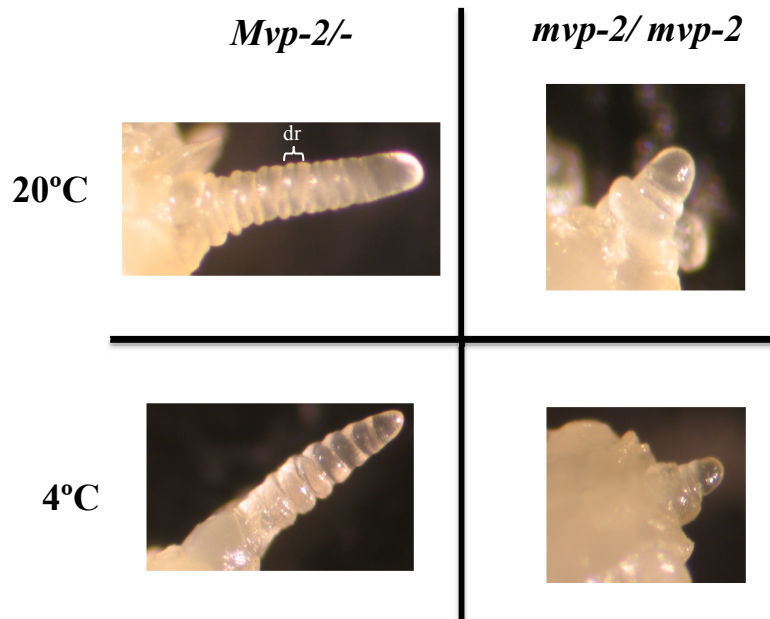

**Figure S3. A)** Average freezing scores using a scale from 0= dead plants to 5= undamaged plants. The -8 °C experiment included 22 *mvp-1/mvp-1* homozygous mutants (black bars) and 35 *Mvp-1/-* plants (gray bars) carrying at least one functional *VRN-1* copy. The -12 °C experiment used 24 *mvp-2/mvp-2* homozygous mutants and 65 *Mvp-2/-* plants. Plants were 35 days old before the cold acclimation treatment. *P* values correspond to ANOVAS comparing *mvp/mvp* (black bars) and *Mvp/-* (gray bars) plants. **B)** Average relative conductivity (ion leakage) of leaf segments from *mvp-2/mvp-2* and *Mvp-2/-* plants. Error bars represent standard errors of the means (SE) based on 9 replications per genotype / temperature combination.

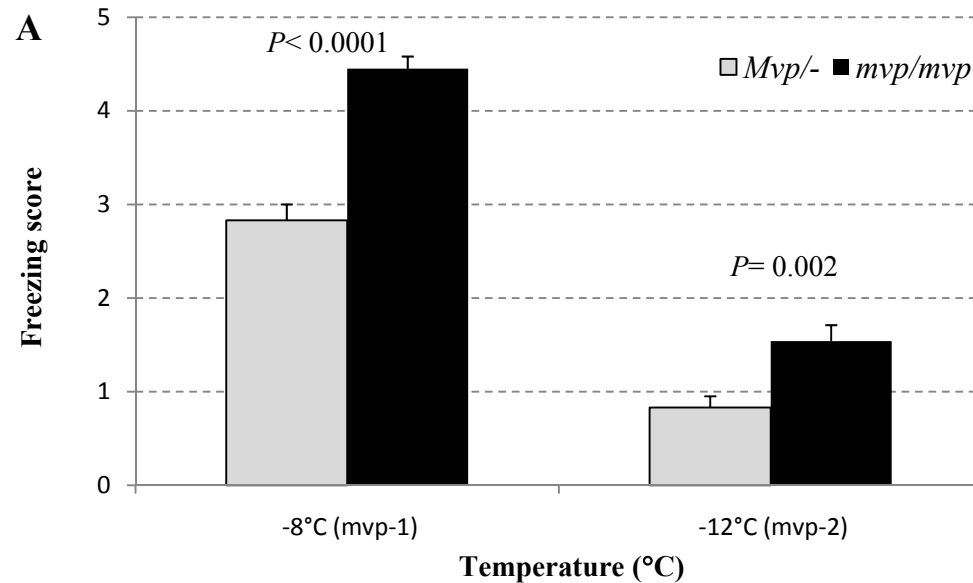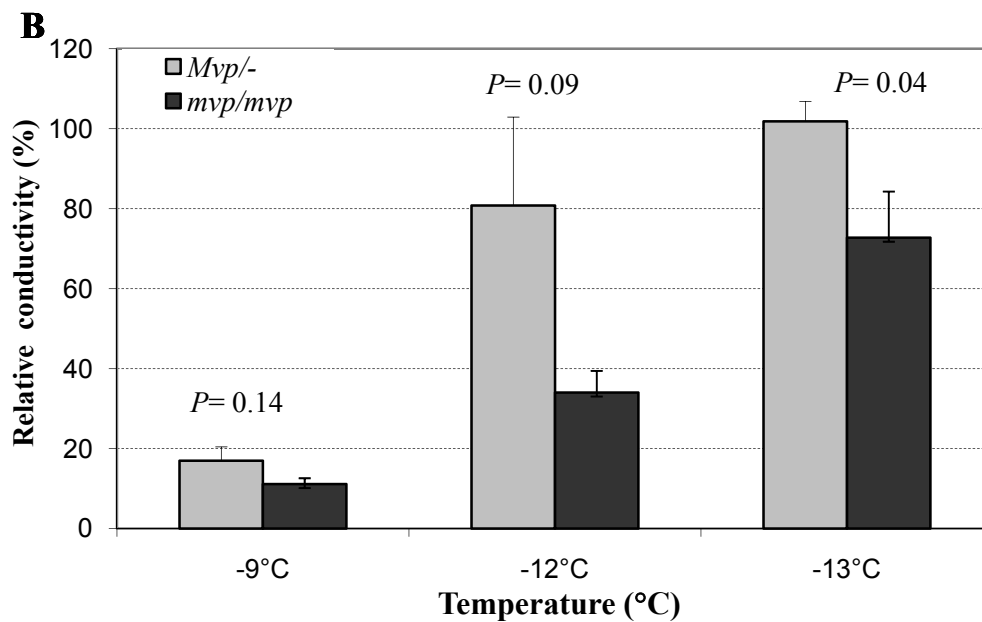

### **Material and Methods used for Figure S3:**

**A) Regrowth.** Seeds were germinated in Petri dishes and seedlings were transplanted to wooden boxes (42 cm long x 30 cm wide x 14 cm high) with 9 cm of soil depth. Soil consisted of 4:1 soil to sand. Plants were grown for 35 days in a Conviron growth chamber using a light intensity of  $260 \mu\text{mol m}^{-2} \text{s}^{-1}$ , constant temperature of  $20^{\circ}\text{C}$ , and 75 % relative humidity. Plants were genotyped with the marker described above in Fig. S1.

After 35 days temperature was decreased  $4^{\circ}\text{C}$  per day until the temperature reached  $4^{\circ}\text{C}$ , which was then held constant for 18 d. Both growth and cold hardening were carried out under long day conditions 16/8 hours (day/night). This was followed by acclimation at  $-2^{\circ}\text{C}$  of 6h and 17h (separated by  $+2^{\circ}\text{C}$  for 7 hours), and at  $-4^{\circ}\text{C}$  for 22 h. Ice nucleation was induced by spraying the leaves with water. Temperature was then lowered  $1^{\circ}\text{C}/\text{h}$  to the target temperatures of  $-9^{\circ}\text{C}$ ,  $-12^{\circ}\text{C}$ , and  $-13^{\circ}\text{C}$ , which were held for 24 h.

After the freezing treatment temperature was increased  $2^{\circ}\text{C}$  per h to  $17^{\circ}\text{C}$  under a light intensity of  $260 \mu\text{mol m}^{-2} \text{s}^{-1}$ , a 16 h/8 h light/dark photoperiod cycle and 75% RH. After two days the leaves were cut several cm above the soil. Regrowth was scored after 14 days of recovery.

**B) Electrolyte leakage assay:** Electrolyte leakage assays from plants treated at  $-9$ ,  $-12$  and  $-13^{\circ}\text{C}$  (Fig. S3B) utilized the middle one-third section of the oldest leaf. After removal from the plant, the weight and length of this leaf section was determined. Leaf sections were rinsed with DI- $\text{H}_2\text{O}$ , and then incubated overnight in 10 ml of DI- $\text{H}_2\text{O}$  in tubes, during which time they were gently shaken.

Maximum ion leakage was determined by boiling three independent *mvp/mvp* homozygous mutant class leaf samples and three independent *Mvp/-* leaf samples for 20 minutes. Conductance was measured using a MultiSample Conductometer (Mikro Kkt., Hungary) in an average of 9 plants per genotype temperature combination. Relative conductance was calculated using the equation,  $\text{Relative conductance} = (\text{Measured conductance} - \text{Average conductance of di-}\text{H}_2\text{O}) / (\text{Average maximum conductance} - \text{Average conductance of di-}\text{H}_2\text{O}) * 100$ .

**Fig. S4.** Quantitative RT-PCR analysis of transcript levels of the *CBF* genes present at the *FR-2* locus. Values are expressed relative to the *TEF1* endogenous control (*COR14b* transcript levels are included as reference). Leaf samples were collected from 8-weeks old plants 8 h after transferring plants from 20 °C to 4 °C. Values in the Y axes were normalized and calibrated using the  $2^{-\Delta\Delta CT}$  method (Livak and Schmittgen 2001). The same calibrator was used for all genes to ensure scales are comparable across genes. Homozygous *mvp-1/mvp-1* plants are indicated in black and those of *Mvp-1/-* plants carrying 1 or 2 functional *VRN-1* copies in gray. Values are averages of 10 biological replications  $\pm$  SE of the means. The inset shows the *CBF* genes with relatively lower transcript levels using a different scale. *P* values were calculated using ANOVA of  $\log(n+1)$  transformed values \*:  $P < 0.05$  and \*\*:  $P < 0.01$ .

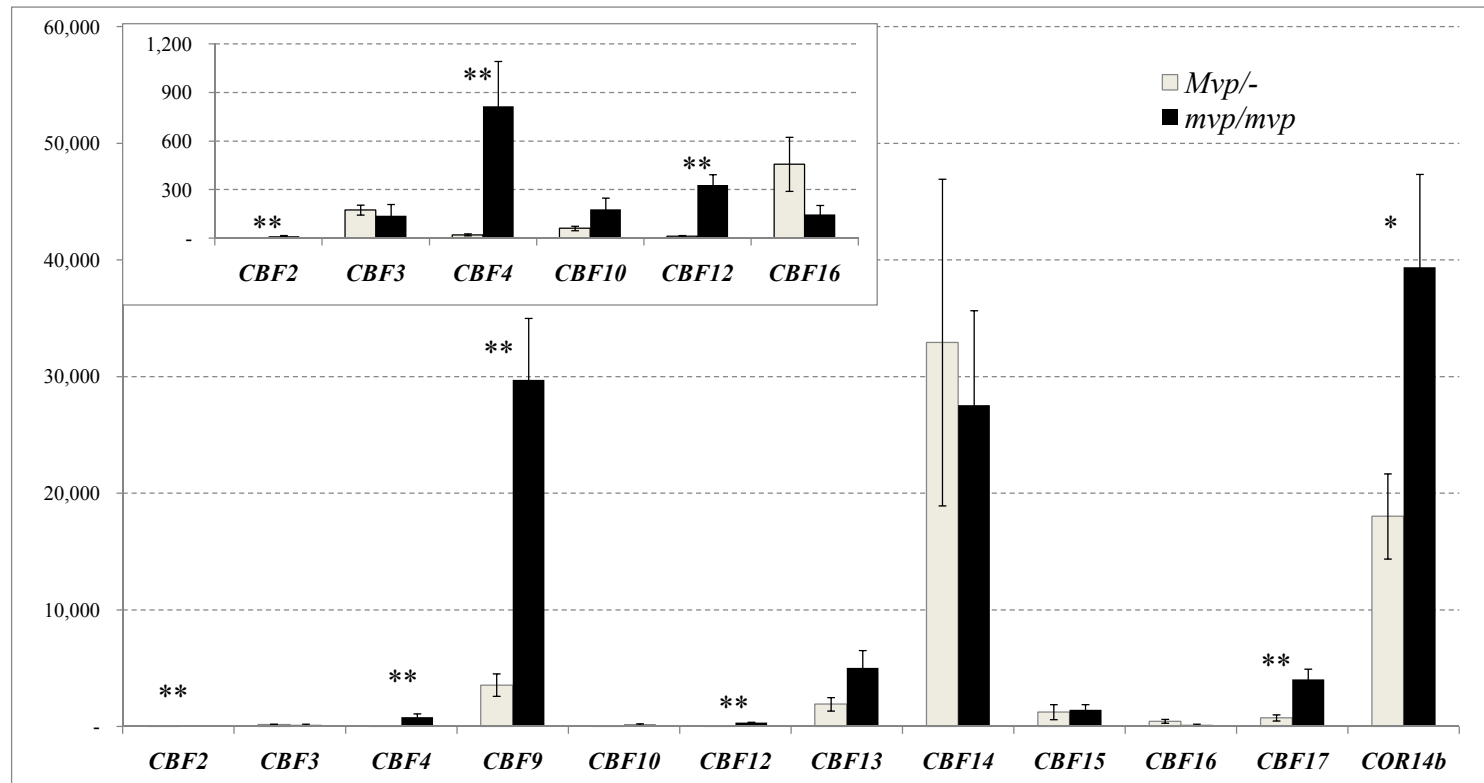

Supplement: pp.110.159079_1.pdf [file pp.110.159079_1.pdf]
